# Supplementary material for: Anisotropic Rashba splitting in Pt-based Janus monolayers PtXY (X,Y = S, Se, or Te)
Source: Royal Society of Chemistry journal article supplement (doi:10.1039/d1na00334h), 2021-01-01
Supplement: d1na00334h1.pdf [file d1na00334h1.pdf]

# Supporting Information for Anisotropic Rashba splitting in Pt-based Janus monolayers PtXY (X, Y = S, Se, or Te)

Paul Albert L. Sino<sup>1</sup>, Liang-Ying Feng<sup>1</sup>, Rovi Angelo B. Villaos<sup>1</sup>, Harvey N. Cruzado<sup>1,2</sup>, Zhi-Quan Huang<sup>1</sup>, Chia-Hsiu Hsu<sup>1</sup>, and Feng-Chuan Chuang<sup>1,3,4\*</sup>

<sup>1</sup>*Department of Physics, National Sun Yat-sen University, Kaohsiung, 80424 Taiwan*

<sup>2</sup>*Institute of Mathematical Sciences and Physics, College of Arts and Sciences, University of the Philippines Los Baños, College, Laguna, 4031 Philippines*

<sup>3</sup>*Department of Physics, National Tsing Hua University, Hsinchu, 30013 Taiwan*

<sup>4</sup>*Physics Division, National Center for Theoretical Sciences, Taipei, 10617 Taiwan*

\*Corresponding Author: Feng-Chuan Chuang

Postal Address: 70 Lienhai Rd., Kaohsiung 80424, Taiwan.

Telephone: +886-7-5253733

E-mail Address: [fchuang@mail.nsysu.edu.tw](mailto:fchuang@mail.nsysu.edu.tw)

**Table S1. Comparison of the Rashba parameter of Janus PtXY monolayers with well-known Rashba materials.**

| Material                   | Type            | $\alpha$ (eV $\cdot$ Å)               | Type of Splitting    | Reference   |
|----------------------------|-----------------|---------------------------------------|----------------------|-------------|
| MoS <sub>2</sub> /Bi (111) | Heterostructure | 1.05                                  | Rashba               | [1]         |
| Pb Thin Film               | Metal Thin Film | 0.04                                  | Rashba               | [2]         |
| PtBi <sub>2</sub>          | Bulk            | 4.36                                  | Rashba + Dresselhaus | [3]         |
| MoSSe                      | ML Janus TMD    | $2.0 \times 10^{-3}$ -1.2             | Rashba               | [3-5]       |
| WSSe                       | ML Janus TMD    | <1.0                                  | Rashba               | [3],[4],[6] |
| PtSSe                      | ML Janus TMD    | 1.65 <sup>*</sup> , 1.33 <sup>†</sup> | Rashba + Dresselhaus | This Work   |
| PtSTe                      | ML Janus TMD    | 1.10 <sup>*</sup> , 1.24 <sup>†</sup> | Rashba + Dresselhaus |             |
| PtSeTe                     | ML Janus TMD    | 0.44 <sup>*</sup> , 0.75 <sup>†</sup> | Rashba + Dresselhaus |             |

\* $\alpha$  at M- $\Gamma$  direction, <sup>†</sup> $\alpha$  at M-K direction

1. K. Lee, W. S. Yun and J. D. Lee, *Phys. Rev. B*, 2015, **91**, 125420.
2. J. H. Dil, F. Meier, J. Lobo-Checa, L. Patthey, G. Bihlmayer, and J. Osterwalder, *Phys. Rev. Lett.*, 2008, **101**, 266802.
3. J. Chen, K. Wu, H. Ma, W. Hu and J. Yang, *RSC Advances*, 2020, **10**, 6388–6394.
4. Y. C. Cheng, Z. Y. Zhu, M. Tahir and U. Schwingenschlögl, *EPL*, 2013, **102**, 57001.
5. F. Li, W. Wei, H. Wang, B. Huang, Y. Dai and T. Jacob, *J. Phys. Chem. Lett.*, 2019, **10**, 559–565.
6. W. Zhou, J. Chen, Z. Yang, J. Liu and F. Ouyang, *Phys. Rev. B*, 2019, **99**, 075160.

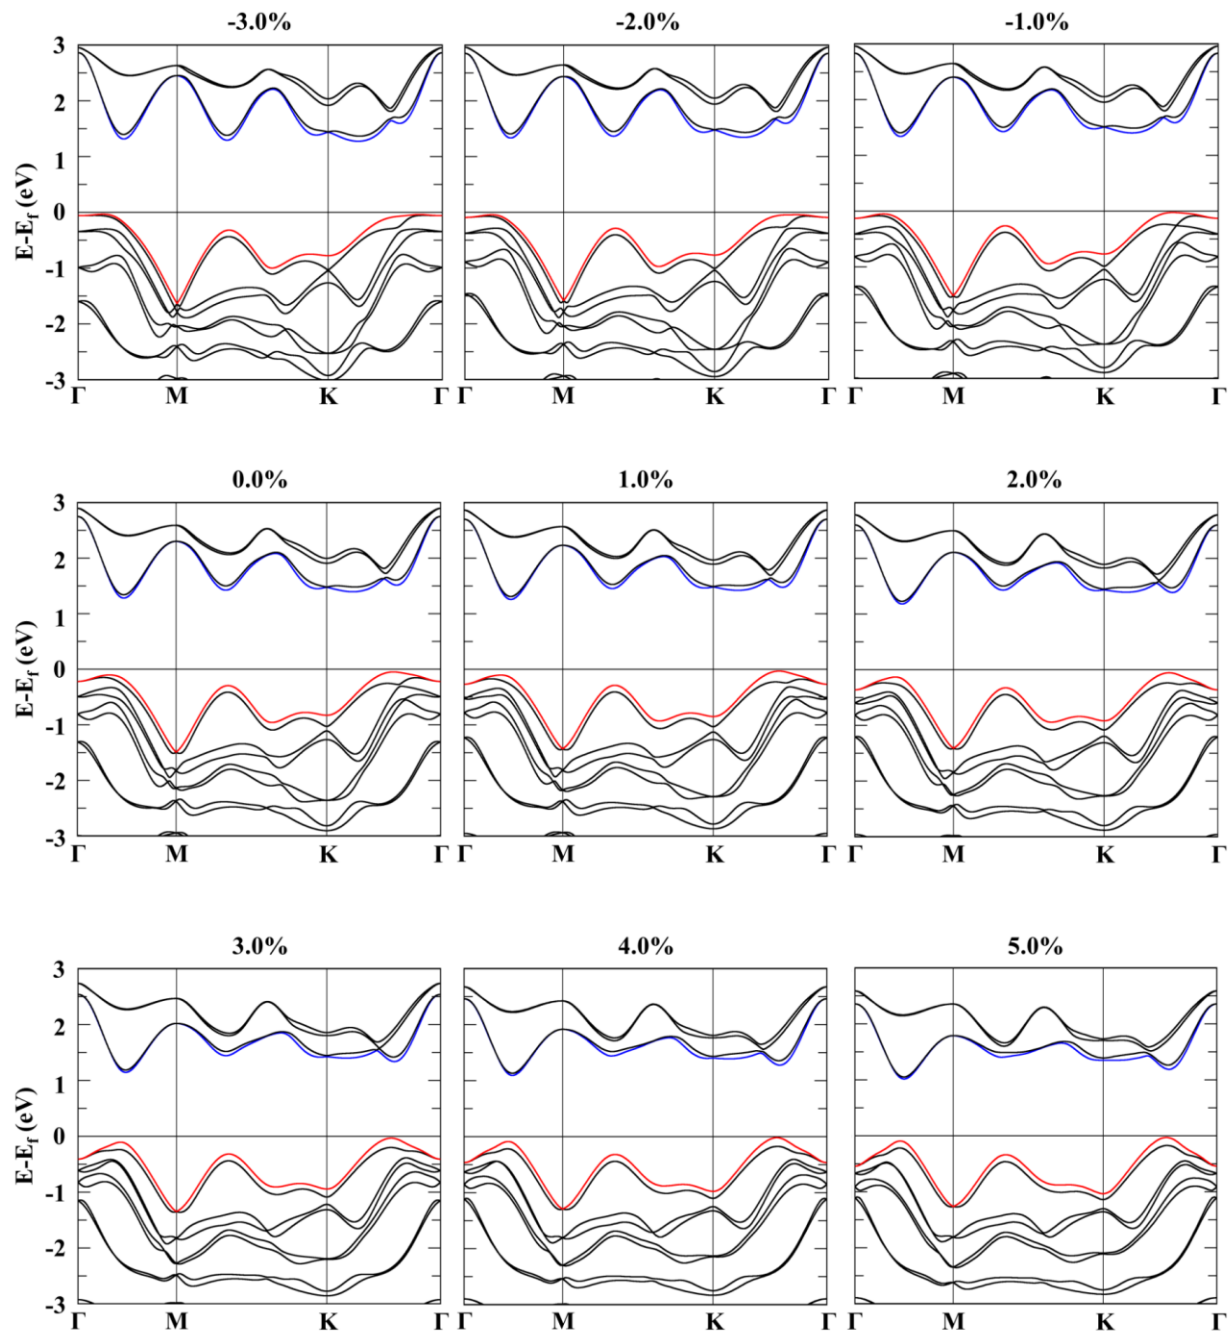

**Figure S1. Band structures under spin-orbit coupling (SOC) of monolayer Janus PtSSe under varying strain from -3.0% to 5.0%. The red and blue colored bands correspond to the valence band maximum (VBM) and conduction band minimum (CBM).**

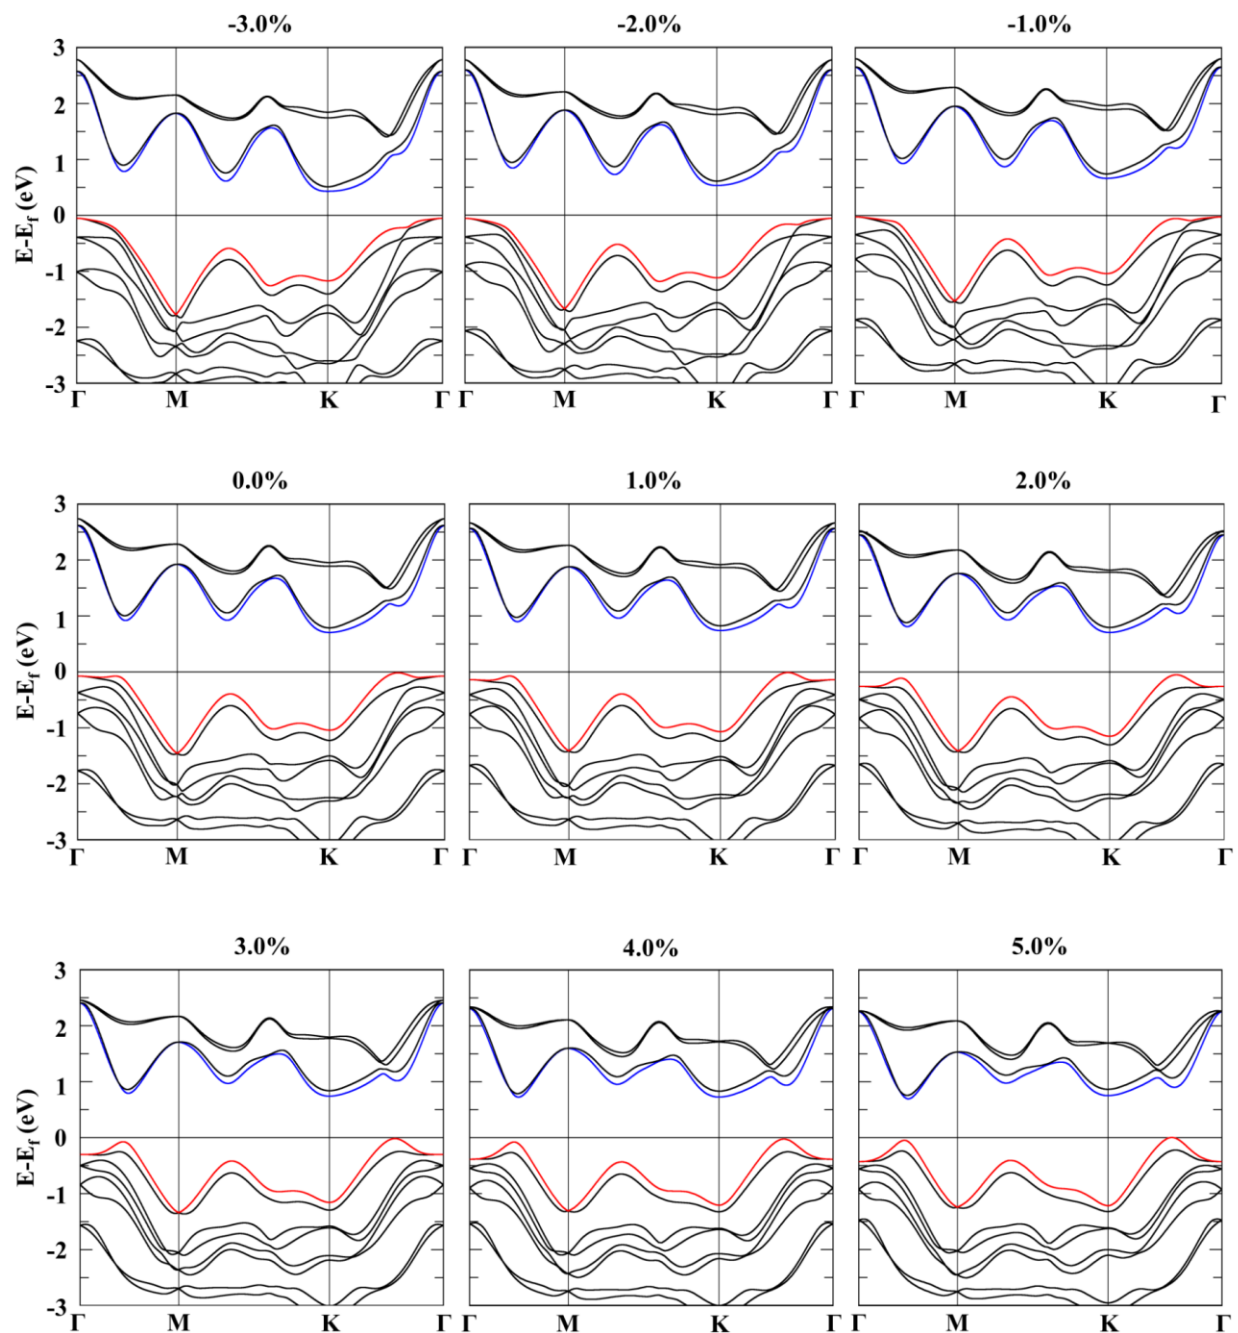

**Figure S2. Band structures under SOC of monolayer Janus PtSTe under varying strain from -3.0% to 5.0%. The red and blue colored bands correspond to the VBM and CBM.**

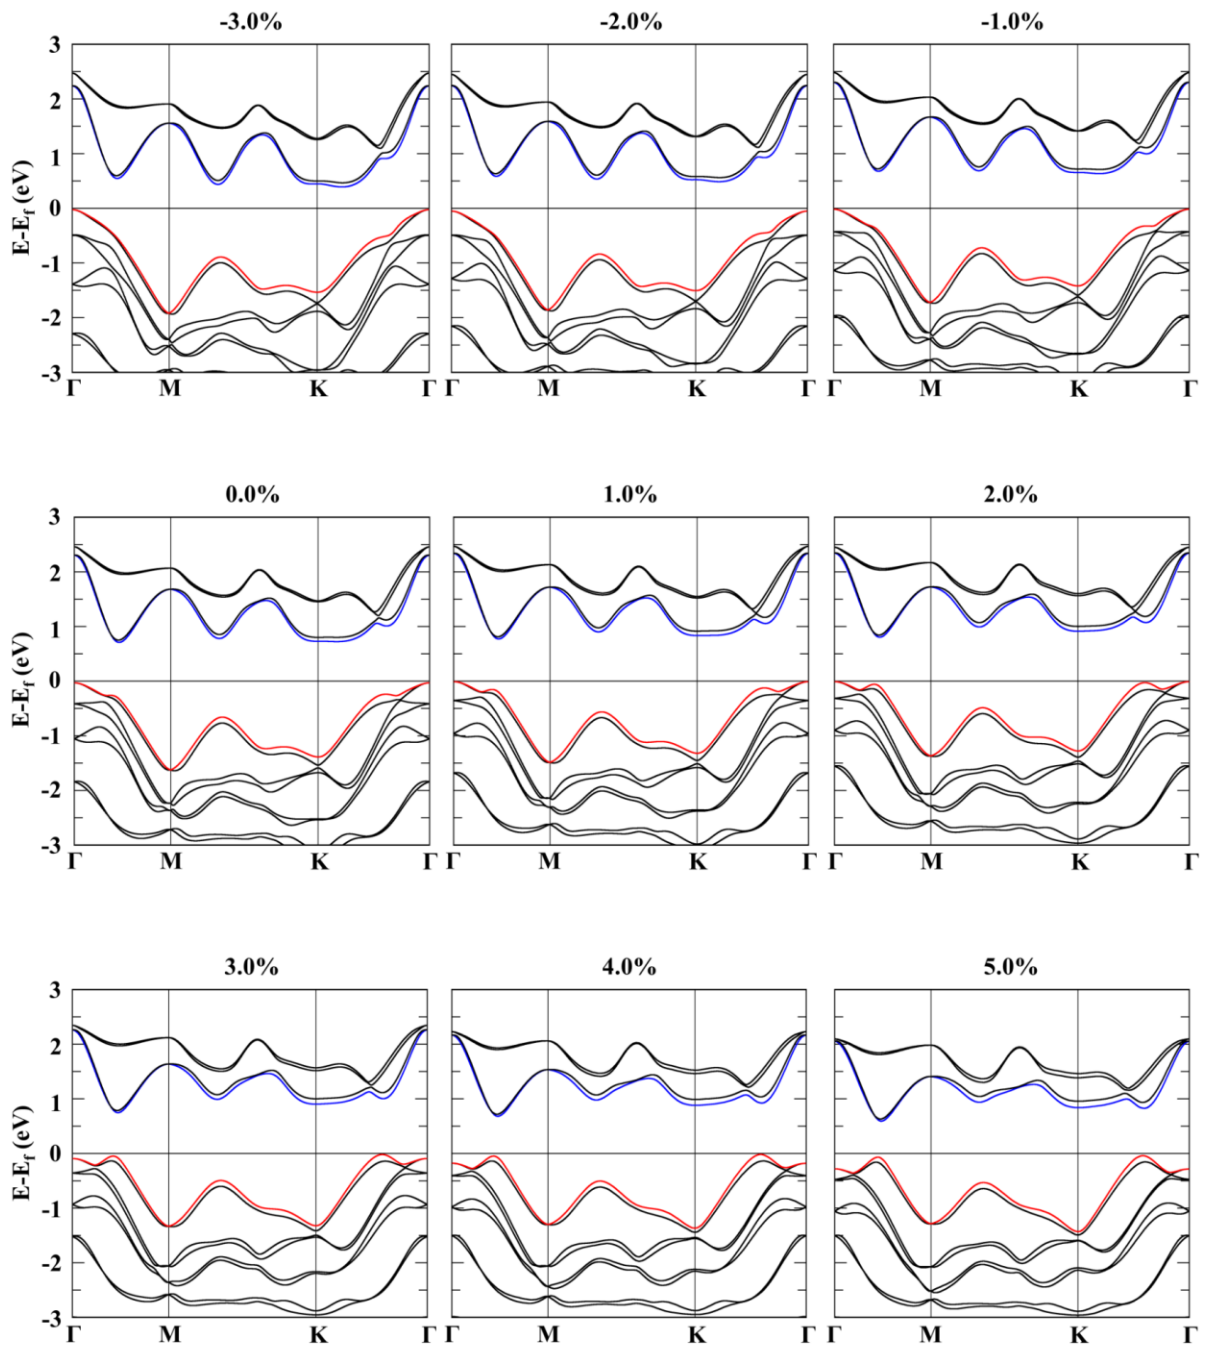

**Figure S3. Band structures under SOC of monolayer Janus PtSeTe under varying strain from -3.0% to 5.0%. The red and blue colored bands correspond to the VBM and CBM.**
